# Supplementary material
Source: PubMed Central journal article supplement (PMC3038480)
Supplement: jc.2010-0692_1.pdf [file jc.2010-0692_1.pdf]

## Supplemental Table 1

| Adrenal Enzyme<br><i>Product/Precursor</i>                     | Cortisol Treatment |                | Fold Change             |
|----------------------------------------------------------------|--------------------|----------------|-------------------------|
|                                                                | -                  | +              |                         |
| <b>17<math>\alpha</math> Hydroxylase</b>                       |                    |                |                         |
| <i>17<math>\alpha</math>OHPreg/Preg</i>                        | 1.7 $\pm$ 0.1      | 4.2 $\pm$ 0.2  | <b>2.5</b> $\uparrow$   |
| <i>17<math>\alpha</math>OHProg/Prog</i>                        | 2.2 $\pm$ 0.1      | 1.5 $\pm$ 0.1  | <b>1.5</b> $\downarrow$ |
| <b>17, 20 Lyase</b>                                            |                    |                |                         |
| <i>DHEA/17<math>\alpha</math>OHPreg</i>                        | 0.4 $\pm$ 0.1      | 0.5 $\pm$ 0.01 | <b>1.3</b> $\uparrow$   |
| <i>A'dione/17<math>\alpha</math>OHProg</i>                     | 0.6 $\pm$ 0.01     | 1.1 $\pm$ 0.01 | <b>1.8</b> $\uparrow$   |
| <b>3<math>\beta</math>HSD2</b>                                 |                    |                |                         |
| <i>Prog/Preg</i>                                               | 3.8 $\pm$ 0.6      | 1.5 $\pm$ 0.2  | <b>2.5</b> $\downarrow$ |
| <i>17<math>\alpha</math>OHProg/17<math>\alpha</math>OHPreg</i> | 4.8 $\pm$ 0.7      | 0.6 $\pm$ 0.01 | <b>8.0</b> $\downarrow$ |
| <i>A'dione/DHEA</i>                                            | 8.0 $\pm$ 1.9      | 1.2 $\pm$ 0.01 | <b>6.7</b> $\downarrow$ |

| Adrenal Enzyme<br><i>Product/Precursor</i> | Cortisol Treatment |                | Fold change             |
|--------------------------------------------|--------------------|----------------|-------------------------|
|                                            | -                  | +              |                         |
| <b>3<math>\beta</math>HSD2</b>             |                    |                |                         |
| <i>A'dione/DHEA</i>                        | 2.2 $\pm$ 0.4      | 0.3 $\pm$ 0.01 | <b>7.3</b> $\downarrow$ |

**Supplemental Table 1. Effect of cortisol upon adrenal steroidogenic enzyme activities in human adrenal cells.** For each enzyme, the product/precursor ratio, as well as the change in the ratio is shown in the absence and presence of cortisol treatment of NCI-H295R cells. Upper and lower panels display metabolites of [<sup>3</sup>H]-pregnenolone and [<sup>3</sup>H]-DHEA, respectively.

## Supplemental Table 2

| Adrenal Enzyme<br><i>Product/Precursor</i>                                          | Cortisol Treatment ( $\mu\text{M}$ ) |               |                |               | Fold Change<br>(0 vs. 100 $\mu\text{M}$ ) |
|-------------------------------------------------------------------------------------|--------------------------------------|---------------|----------------|---------------|-------------------------------------------|
|                                                                                     | 0                                    | 5             | 50             | 100           |                                           |
| <b>17<math>\alpha</math> Hydroxylase</b><br><i>17<math>\alpha</math>OHPreg/Preg</i> | 2.7 $\pm$ 0.2                        | 2.8 $\pm$ 0.1 | 2.9 $\pm$ 0.04 | 3.0 $\pm$ 0.1 | 1.1 $\uparrow$                            |
| <b>17, 20 Lyase</b><br><i>DHEA/17<math>\alpha</math>OHPreg</i>                      | 2.7 $\pm$ 0.2                        | 2.3 $\pm$ 0.1 | 2.2 $\pm$ 0.04 | 2.0 $\pm$ 0.1 | 1.4 $\downarrow$                          |

**Supplemental Table 2. Effect of cortisol upon adrenal steroidogenic enzyme activities in non-adrenal cells engineered to express *CYP17A1*.** COS-7 cells were transfected with *CYP17A1* and treated with [ $^3\text{H}$ ]-pregnenolone in the absence and presence of different concentrations of cortisol. The product/precursor ratio as well as the change in this ratio at cortisol concentrations of 0 vs. 100  $\mu\text{M}$ , are shown for each enzyme.
